# Supplementary material for: On the impact of Himalaya-induced gravity waves on the polar vortex, Rossby wave activity and ozone
Source: Copernicus journal article supplement (doi:10.5194/egusphere-2022-474), 2022-06-20
Supplement: Supplementary file 1 [file egusphere-2022-474-supplement.zip]

# Supplement to "On the impact of Himalaya-induced gravity waves on the polar vortex, Rossby wave activity and ozone"

Ales Kuchar<sup>1</sup>, Petr Sacha<sup>2,3</sup>, Roland Eichinger<sup>2,4</sup>, Christoph Jacobi<sup>1</sup>, Petr Pisoft<sup>2</sup>, and Harald E. Rieder<sup>3</sup>

<sup>1</sup>Institute for Meteorology, Universität Leipzig, Stephanstr. 3, 04103 Leipzig, Germany

<sup>2</sup>Department of Atmospheric Physics, Faculty of Mathematics and Physics, Charles University, V Holesovickach 2, 180 00 Prague 8, Czech Republic

<sup>3</sup>Institute of Meteorology and Climatology, University of Natural Resources and Life Sciences, Vienna (BOKU), Gregor-Mendel-Strasse 33, 1180 Vienna, Austria

<sup>4</sup>Deutsches Zentrum für Luft- und Raumfahrt (DLR), Institut für Physik der Atmosphäre, Oberpfaffenhofen, Germany

**Correspondence:** Ales Kuchar (ales.kuchar@uni-leipzig.de)

*Copyright statement.* TEXT

## 1 Table of contents

1. Figures S1 to S3

2. Html interactive file showing Empirical distribution function of interpeak timescales [day] (ecdf\_interpeak\_times .  
html)

5

## 2 Introduction

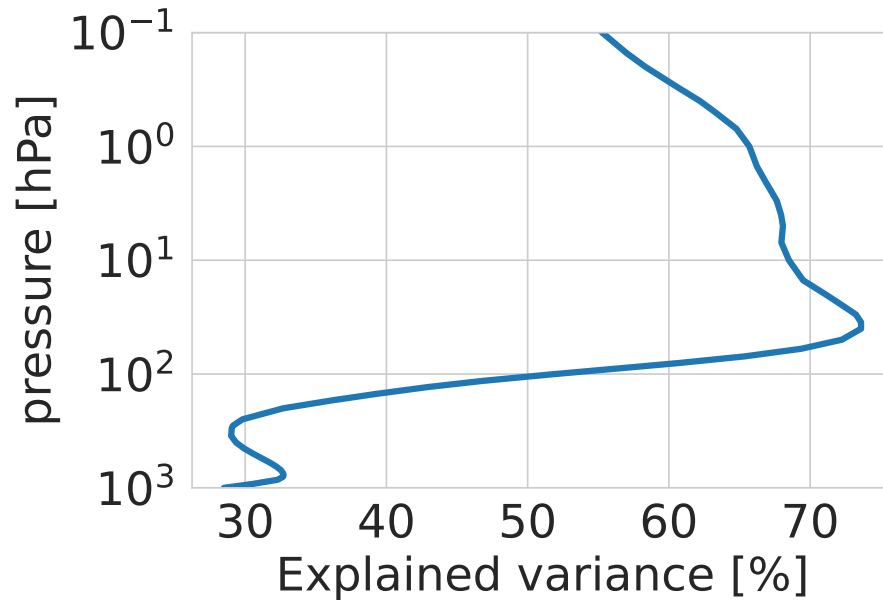

**Figure S1.** Explained variance [%] of Northern Annular Mode time series.

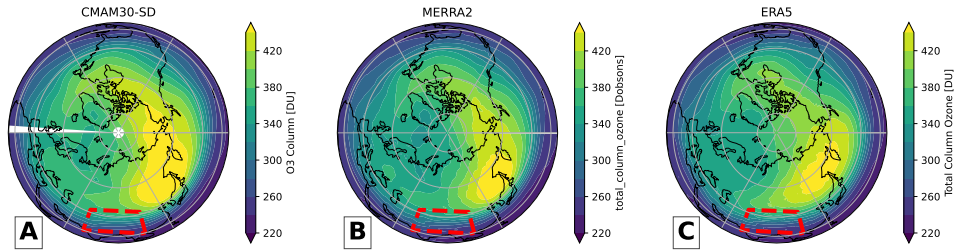

**Figure S2.** Composites in absolute values documenting total column ozone [DU] in CMAM30-SD (A), MERRA2 (B), and ERA5 (C), respectively. The red box represents the Himalaya (70-102.5°E and 20-40°N) hotspot.

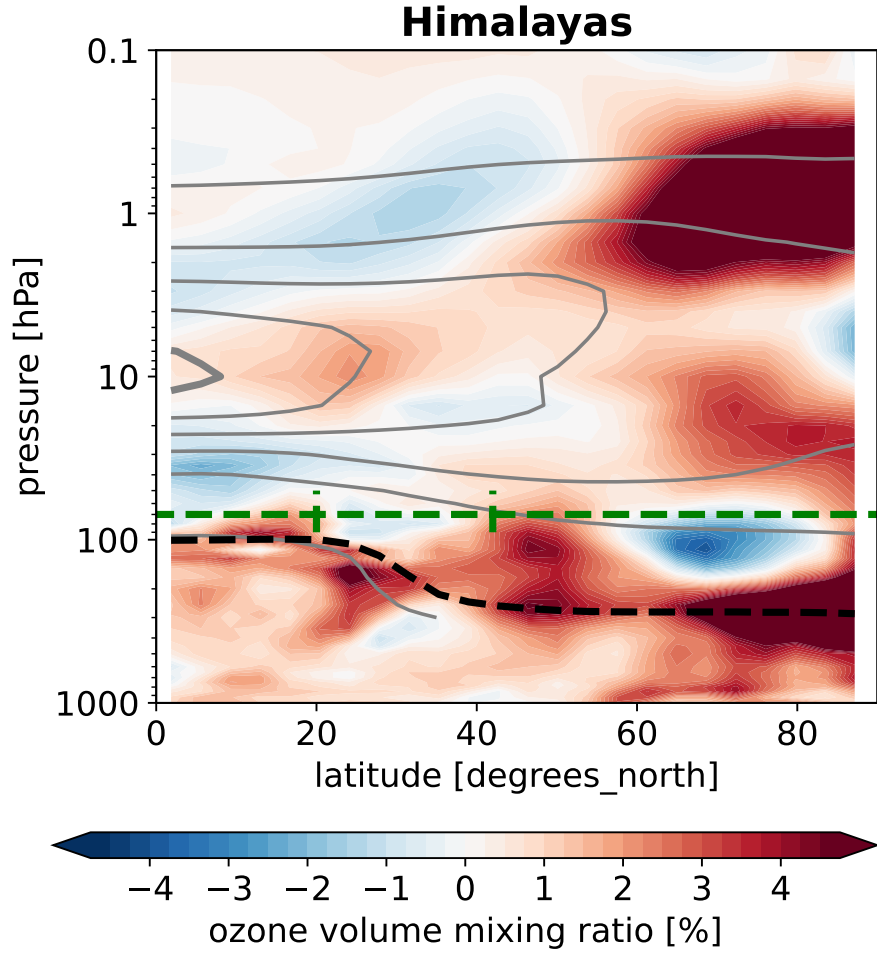

**Figure S3.** Ozone anomalies (units: %, colored regions) and absolute (gray contour levels:  $1 \cdot 10^{-7}$ ,  $2 \cdot 10^{-6}$ ,  $4 \cdot 10^{-6}$ ,  $6 \cdot 10^{-6}$ ,  $8 \cdot 10^{-6}$ ,  $1 \cdot 10^{-5}$  mole/mole) composite average at lag=0 representing the Himalayas. Green horizontal and vertical lines represent regions of a particular GW hotspot. Black dashed line corresponds to tropopause pressure level of respective composite.
